# Supplementary material for: Confirmation of the coexistence of two tautomers of 2-mercaptothiazoline on the Ge(100) surface
Source: Royal Society of Chemistry journal article supplement (doi:10.1039/c3cp52760c), 2013-01-01
Supplement: c3cp52760c.pdf [file c3cp52760c.pdf]

[Supporting Information]

# Confirmation of the Coexistence of Two Tautomers of 2-Mercaptothiazoline on the Ge(100) Surface

Youngchan Park,<sup>[a]</sup> Sena Yang,<sup>[b]</sup> Myungjin Lee,<sup>[a]</sup> Heeseon Lim<sup>[b]</sup>

Yaewon Kim,<sup>[a]</sup> Sehun Kim,<sup>\*[b]</sup> and Hangil Lee<sup>\*[a]</sup>

<sup>a</sup>Department of Chemistry, Sookmyung Women's University, Seoul 140-742, Republic of Korea,

<sup>b</sup>Department of Chemistry, KAIST, Guseong-dong, Yuseong-gu, Daejeon-si, Gyeongbuk, 790-784.

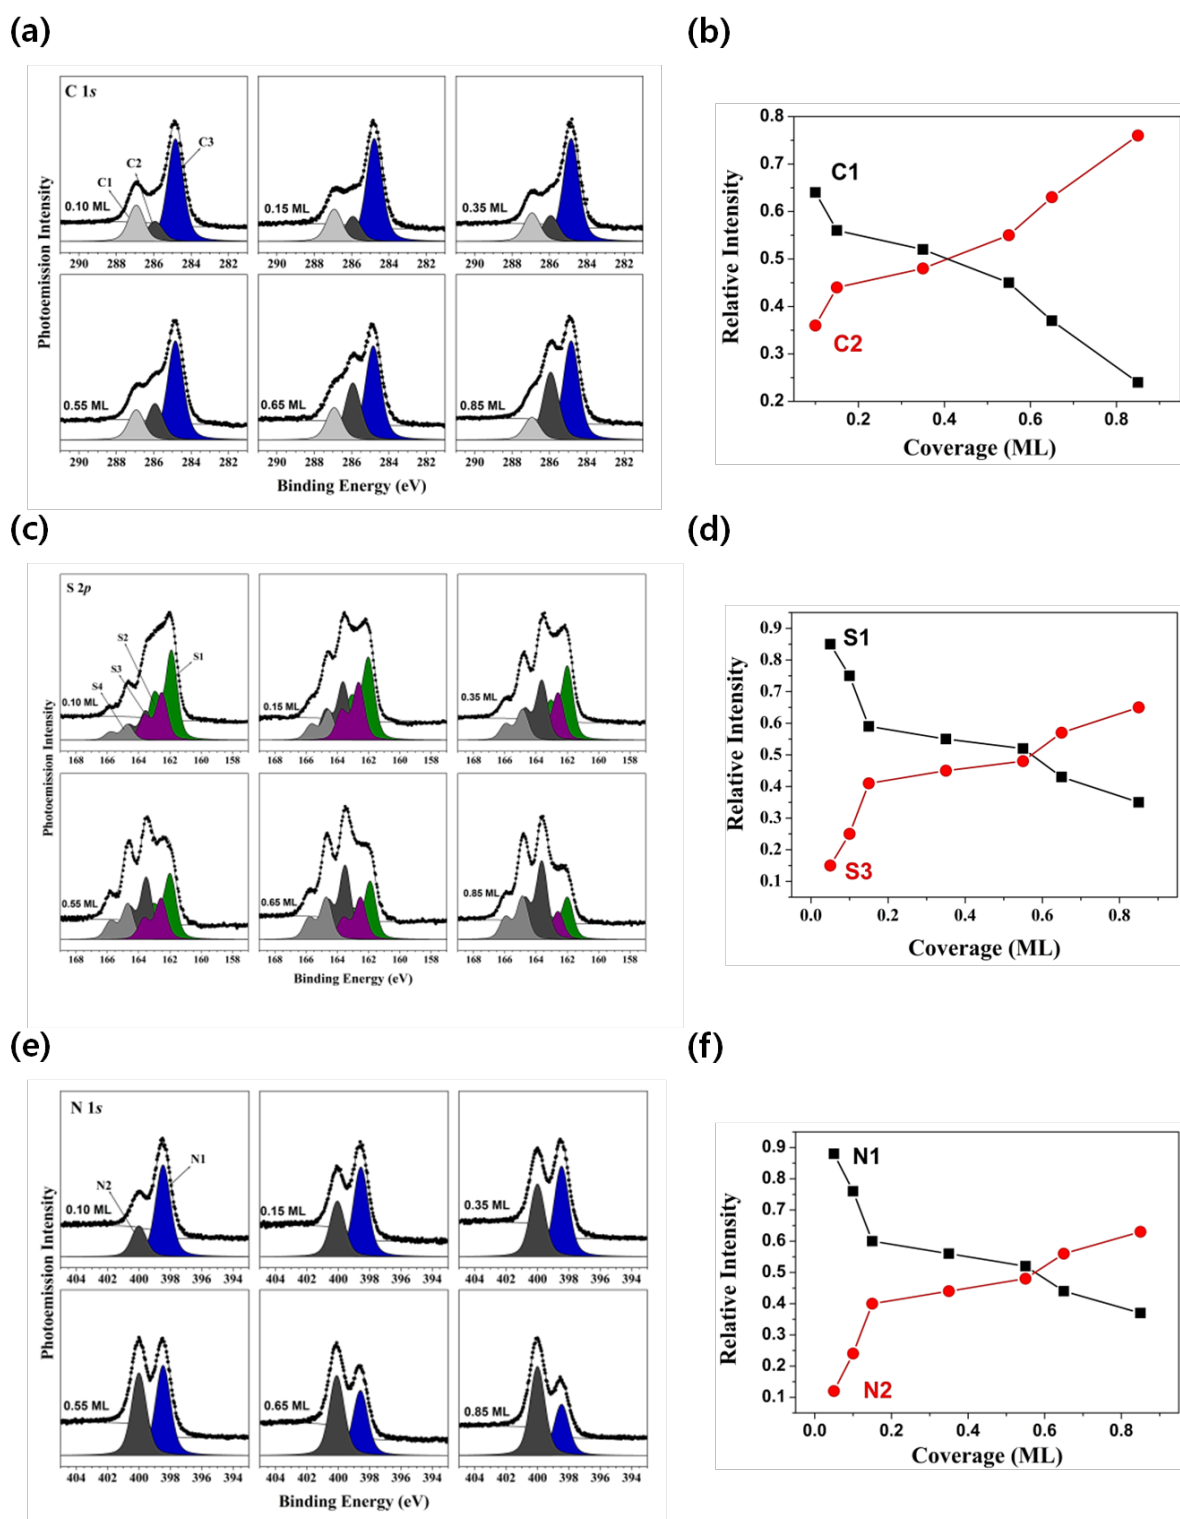

**Figure S1.** Core-level spectra of the (a) C 1s, (c) S 2p, and (e) N 1s as a function of 2-mercaptothiazoline coverages on the Ge(100) surfaces at room temperature. Relative intensity changes between (b) C1 (thiol form) and C2 (thione form), (d) S1 and S3, (f) N1 and N2 upon the coverage adsorbed on the Ge(100) surface.
